# Supplementary material for: An immunomics approach for the analysis of natural antibody responses to Plasmodium vivax infection
Source: Royal Society of Chemistry journal article supplement (doi:10.1039/c5mb00330j), 2015-06-11
Supplement: c5mb00330j5.xlsx [file c5mb00330j5.xlsx]

## Sheet: Results
SpotID	H05	H07	H08	H09	H10	H19	H20	H21	H22	H23	PV11	PV12	PV13	PV14	PV15	PV16	PV17	PV18	PV19	PV20	PV21	PV22	PV23	PV24	PV25	nC	nE	mean.H	mean.Pv	stdC	stdE	pVal	BH_p	Bonf_p	AUC	AUC_Pval	seC	sePv	Pv reactive	Sdiag	retrans H	retrans Pv	BH_p	cut-off	retrans.H.SE.Lower	retrans.Pv.SE.Lower	retrans.H.SE.Upper	retrans.Pv.SE.Upper	Freq.H
PVX_119445_1o1	12.7992	13.0888	14.1527	12.7894	13.4906	13.3198	14.6876	13.7492	13.5547	12.8596	14.7236	15.4158	15.0836	14.4071	15.4827	13.7875	14.661	13.5152	16.2802	14.5895	13.1189	15.8591	13.8543	15.6705	13.6073	10	15	13.4492	14.6704	0.622135	0.955694	0.000574114	0.0211306	1	0.866667	0.00147089	0.196736	0.246759	1	1	6479.83	21279.6	0.0211306	0.05	1425.72	4099.44	1634.03	4864.14	1
PVX_115450_1o2	11.2167	11.255	11.2667	11.0912	11.0196	11.3656	11.5355	11.237	11.6687	10.8934	14.9468	15.6786	13.5744	12.2376	15.4037	15.4379	13.9075	14.4613	11.6406	12.7193	13.4898	14.3689	12.4026	15.4162	13.2037	10	15	11.255	13.9259	0.230233	1.30858	1.12748e-08	2.38237e-05	2.38237e-05	0.993333	1.22371e-06	0.0728061	0.337873	1	1	-2260.4	10767.9	2.38237e-05	0.05	120.271	3249.68	126.496	4107.24	0
PVX_090095_1o1	12.2215	12.5745	12.5755	12.3719	12.4276	12.3507	12.8128	12.3367	12.3702	12.3285	13.9891	14.0545	13.2972	12.8845	14.8305	13.0492	14.8591	13.1291	12.8706	14.0956	12.9124	14.9289	12.9712	16.2992	13.2198	10	15	12.437	13.8261	0.171204	1.02336	7.05747e-05	0.00743464	0.149124	1	6.11853e-07	0.0541394	0.26423	1	1	840.887	9726.83	0.00743464	0.05	204.235	2430.52	212.044	2919.04	0.4
PVX_090230_1o2	12.2986	12.2824	12.3342	12.351	12.4069	12.3514	13.4503	12.6779	12.2881	12.2602	14.3466	14.439	12.7992	14.7786	15.0879	13.4164	14.2685	13.6777	12.2733	13.8274	12.5816	14.0389	12.5525	14.3065	14.7273	10	15	12.4701	13.8081	0.364615	0.896485	4.9738e-05	0.00598345	0.105096	0.9	0.000402599	0.115302	0.231471	1	1	969.542	9547.28	0.00598345	0.05	435.809	2126.19	472.069	2496.21	0.3
PVX_095220_1o1	13.2142	12.3327	12.4932	12.3369	12.2722	13.0385	12.9195	12.7911	12.5045	12.7526	15.258	13.1858	13.5756	12.846	15.1401	13.0203	12.8562	13.5046	13.5782	14.472	12.5287	13.7726	12.3858	16.1254	13.5478	10	15	12.6655	13.7198	0.326122	1.08028	0.00300741	0.0426487	1	0.86	0.00185881	0.103129	0.278926	1	1	1792.61	8695.78	0.0426487	0.05	448.208	2371.83	481.421	2877.72	0.7
PVX_081745_1o7	12.4888	12.3825	12.3333	12.5439	12.5851	12.3881	12.5548	12.7263	12.346	12.4722	15.1624	14.1313	13.0078	14.1414	15.4161	13.072	12.9468	12.5052	12.7378	12.7813	12.7885	14.9506	13.006	16.3152	12.2443	10	15	12.4821	13.6804	0.124253	1.25162	0.00191624	0.0343137	1	0.906667	0.000302255	0.0392924	0.323167	1	1	1016.9	8332.59	0.0343137	0.05	153.716	2634.76	157.96	3296.28	0.7
PVX_002535_2o2	12.1738	12.6602	12.3145	12.4069	12.0965	12.393	13.3919	11.9811	12.1151	12.1364	14.6382	14.115	12.9606	12.634	15.0874	13.1385	13.6017	13.3603	12.2048	14.2376	15.4567	12.5264	14.0935	13.4515	12.9579	10	15	12.3669	13.6309	0.410613	0.955596	0.000181487	0.0127827	0.383482	0.913333	0.000223938	0.129847	0.246734	1	1	577.969	7889.83	0.0127827	0.05	454.651	1994.21	497.469	2366.16	0.4
PVX_100800_1o2	12.353	12.467	12.4545	12.386	12.9977	12.4839	12.4419	12.3747	12.7125	12.3843	12.9126	12.3363	14.0962	12.7019	15.2498	12.4747	14.4551	12.4006	14.2853	15.0202	14.2978	13.0526	12.7046	15.6506	12.6685	10	15	12.5056	13.6205	0.200829	1.14709	0.00221716	0.0360374	1	0.826667	0.00542836	0.0635077	0.296176	1	1	1110.69	7797.86	0.0360374	0.05	250.423	2337.35	261.693	2870	0.6
PVX_092885_1o2.DUP	12.3769	12.2933	12.4203	12.2562	12.327	12.285	12.1434	12.0741	12.2397	12.2288	14.1424	12.6924	14.9636	12.453	15.4485	14.763	13.929	13.1485	12.4693	13.2789	12.8983	13.2963	12.4358	14.2114	12.8833	10	15	12.2645	13.5342	0.102716	0.982655	0.000142906	0.0107843	0.30196	1	6.11853e-07	0.0324815	0.25372	1	1	215.814	7067.28	0.0107843	0.05	109.535	1913.21	112.029	2281.07	0.1
PVX_114560_1o1	12.498	12.4122	12.5292	12.3943	12.4849	12.288	12.7025	12.1346	12.4598	12.3002	14.0744	13.5382	14.7086	12.4034	14.7764	13.7321	13.6811	14.0723	12.6231	13.4082	12.9577	14.2094	12.4756	13.2044	13.1422	10	15	12.4204	13.5338	0.155477	0.749297	0.00011372	0.0100379	0.24029	0.926667	0.000118699	0.0491661	0.193468	1	1	777.23	7063.81	0.0100379	0.05	183.659	1488.41	190.026	1702.01	0.7
PVX_117450_1o1	12.4924	12.7008	12.4565	12.5529	12.7333	12.377	12.9093	12.999	12.4467	12.5046	15.2002	12.4528	13.8307	13.2535	13.7601	12.6503	13.0362	12.7969	13.2598	15.0353	12.88	14.0309	12.9083	14.3449	13.1227	10	15	12.6173	13.5042	0.209896	0.842767	0.00314375	0.0435827	1	0.88	0.000899424	0.0663751	0.217602	1	1	1578.79	6822.62	0.0435827	0.05	282.52	1626.7	295.822	1891.52	0.9
PVX_090295_2o3	11.7105	12.5386	12.0341	11.6261	11.5002	11.6009	11.9078	11.752	11.7387	11.6183	12.8623	13.3784	14.1746	12.4127	15.1588	15.494	13.0695	13.8023	12.2758	12.7032	12.5634	13.9648	12.0618	13.6263	13.6384	10	15	11.8027	13.4124	0.301608	1.00989	6.64198e-06	0.00200493	0.0140345	0.98	4.28297e-06	0.0953767	0.260753	1	1	-1131.77	6106.69	0.00200493	0.05	228.54	1802.76	244.16	2159.9	0.1
PVX_118610_1o5	12.4064	12.4356	12.4524	12.3859	12.4056	12.5313	12.4268	12.4296	12.4844	12.4158	14.4027	13.2462	13.7884	12.3943	14.7719	12.4924	13.1719	14.2112	12.8701	13.2054	12.7953	13.9181	12.3612	13.7173	12.8421	10	15	12.4374	13.3459	0.0428479	0.756273	0.00110872	0.0302095	1	0.866667	0.00147089	0.0135497	0.195269	1	1	842.283	5615.32	0.0302095	0.05	51.849	1317.99	52.3382	1509.01	0.9
PVX_116770_1o4	12.2832	11.7369	11.9014	11.8369	11.6811	11.9307	11.9037	12.0844	11.6896	11.632	14.5614	13.1779	12.4147	12.6808	15.0644	15.4633	12.2246	12.6112	12.3906	13.5509	13.4383	13.9338	12.0363	13.3166	13.1298	10	15	11.868	13.333	0.201706	1.03914	3.30419e-05	0.0049642	0.0698175	0.98	4.28297e-06	0.063785	0.268306	1	1	-966.429	5522.49	0.0049642	0.05	161.659	1751.14	168.967	2109.05	0
PVX_084425_1o1	12.1168	12.2558	12.3442	12.2214	12.3572	12.3158	12.4614	12.241	12.2536	12.1126	13.2124	12.5733	14.3004	12.2055	14.8586	13.2536	14.5611	12.5843	12.7392	13.0507	12.6189	13.9903	12.4559	13.3627	14.0832	10	15	12.268	13.3233	0.107361	0.841218	0.000381031	0.0167733	0.805119	0.94	5.93497e-05	0.0339505	0.217202	1	1	227.752	5453.88	0.0167733	0.05	114.709	1432.62	117.44	1665.39	0.1
PVX_116665_1o1	12.5097	12.5281	12.4576	12.4958	12.5012	12.3733	12.7887	12.4499	12.4166	12.3556	13.4839	12.7086	14.0984	12.7205	14.4173	13.1155	13.4644	12.6684	12.7142	14.435	13.1094	13.1818	12.4725	13.6001	13.5871	10	15	12.4876	13.3185	0.120583	0.632402	0.00115011	0.0302095	1	0.94	5.93497e-05	0.0381317	0.163285	1	1	1038.96	5419.4	0.0302095	0.05	149.81	1093.17	153.823	1224.17	0.8
PVX_122050_1o2	12.2327	12.2404	12.3054	12.1599	12.2924	12.2501	12.4254	12.1764	12.1008	12.428	13.2765	12.6497	13.8095	12.3648	14.5496	14.7208	12.5219	12.4284	12.4911	12.4983	15.6087	13.3597	12.0967	13.697	13.3804	10	15	12.2612	13.2969	0.106578	1.02628	0.00171421	0.0326317	1	0.92	0.000164588	0.0337029	0.264983	1	1	204.535	5267.54	0.0326317	0.05	113.346	1688.6	116.025	2029.06	0.2
PVX_081565_1o1	12.1148	12.5873	12.3556	12.3567	12.0985	11.9645	12.5834	12.4408	12.2925	12.3386	13.141	12.5088	13.3101	12.3207	12.878	12.7368	12.6249	13.1798	15.721	13.5302	13.0088	14.1422	13.4149	13.4785	12.7736	10	15	12.3133	13.2513	0.204469	0.826809	0.00129432	0.0305784	1	0.946667	4.09941e-05	0.0646587	0.213481	1	1	385.081	4954.55	0.0305784	0.05	223.059	1341.17	233.283	1555.07	0.3
PVX_003565_1o1	12.3284	12.2999	12.3894	12.2735	12.3129	12.2919	12.3428	12.1424	12.1113	12.2428	13.7909	13.3889	12.5378	12.9359	14.5794	12.6447	12.5839	12.928	12.42	13.9144	13.0734	12.6126	12.8156	14.7441	12.4265	10	15	12.2735	13.1597	0.0870924	0.762685	0.00132289	0.0305784	1	1	6.11853e-07	0.027541	0.196924	1	1	246.776	4355.03	0.0305784	0.05	93.619	1167.61	95.4233	1338.38	0.1
PVX_121935_2o2	11.5482	11.6791	11.6391	11.5543	11.5273	11.9236	11.6267	11.524	11.8207	11.6181	13.6619	14.7013	12.5844	12.1527	14.4355	13.9816	12.539	13.4775	11.5937	13.0435	12.2234	12.9596	12.6115	13.6662	13.0234	10	15	11.6461	13.1104	0.131999	0.873615	4.88559e-06	0.00172054	0.0103233	0.96	1.83556e-05	0.0417419	0.225566	1	1	-1499.27	4047.04	0.00172054	0.05	91.4023	1279.97	94.0855	1496.59	0
PVX_087670_1o1	11.5404	11.4691	11.615	11.5146	11.3903	11.6449	11.9274	11.6779	11.9117	11.9973	13.0628	12.7257	13.0614	12.3409	14.5662	13.5472	12.4291	13.243	12.0021	13.1992	13.2542	13.039	12.4157	13.0564	12.3263	10	15	11.6689	12.9513	0.209495	0.627872	1.83382e-06	0.00146799	0.00387486	1	6.11853e-07	0.0662481	0.162116	1	1	-1448.3	3123.8	0.00146799	0.05	146.132	841.784	152.999	941.895	0
PVX_094805_1o1	12.0193	11.8889	11.9783	11.968	11.9603	12.2777	12.1315	11.9146	12.0649	12.0765	13.0687	13.8065	13.3501	12.2362	14.668	13.6172	12.1479	11.8422	13.0701	13.237	11.9801	12.9305	11.714	13.0971	12.0879	10	15	12.028	12.8569	0.115313	0.840283	0.00278153	0.0411005	1	0.806667	0.00961649	0.0364652	0.21696	1	1	-528.018	2622.21	0.0411005	0.05	104.235	1035.78	106.903	1203.87	0
PVX_123150_1o1	11.784	12.1051	11.9012	12.2117	11.8659	11.9861	11.9221	11.7246	12.1447	11.8499	13.7381	13.478	12.7958	11.8321	14.1942	12.3464	12.4048	12.0249	12.6583	12.0983	12.1981	13.0938	12.08	12.8049	14.7426	10	15	11.9495	12.8327	0.159986	0.862724	0.00184028	0.0337428	1	0.88	0.000899424	0.0505921	0.222754	1	1	-749.095	2498.79	0.0337428	0.05	136.295	1043.7	141.16	1217.96	0
PVX_089870_2o2	11.9238	11.9755	12.0493	12.0423	12.0759	12.0456	12.2356	12.1378	12.0849	12.0316	12.2671	13.1365	14.0348	12.2997	12.7846	12.8141	12.4809	13.1785	12.4338	12.4542	12.4485	12.5115	12.3978	12.4355	14.6176	10	15	12.0602	12.8197	0.084909	0.679844	0.00177709	0.033271	1	1	6.11853e-07	0.0268506	0.175535	1	1	-433.643	2433.36	0.033271	0.05	78.7473	828.22	80.2266	935.378	0
PVX_114095_2o2	11.8273	11.6919	11.7693	11.9913	11.9209	12.0844	11.9978	11.9177	11.9117	11.8606	13.1417	12.989	11.9862	12.8312	14.2797	13.6825	12.1417	11.817	12.0225	12.0448	11.9075	13.0416	12.065	12.8904	14.384	10	15	11.8973	12.7483	0.115447	0.854847	0.00194474	0.0345123	1	0.866667	0.00147089	0.0365075	0.220721	1	1	-889.753	2084.44	0.0345123	0.05	95.3156	976.104	97.7584	1137.47	0
PVX_089990_7o10	11.8708	11.9041	11.9317	11.8997	11.942	12.0289	12.0821	12.0171	12.2973	11.9437	12.2436	12.1155	12.5506	12.3333	14.2792	11.9612	13.3866	12.0418	12.5561	13.8701	12.4621	13.8547	12.1494	12.4582	12.4443	10	15	11.9917	12.7138	0.125928	0.749048	0.00364658	0.0466898	1	0.94	5.93497e-05	0.0398221	0.193403	1	1	-631.682	1921.65	0.0466898	0.05	110.877	842.814	113.98	963.722	0
PVX_089330_1o3	11.9896	11.9397	11.8149	12.0037	11.9429	12.0267	12.1166	11.9863	11.9734	12.029	12.5128	12.1121	12.6659	12.0971	13.1977	12.3941	13.987	12.1144	12.2228	12.4162	12.2339	13.9334	12.0341	12.645	12.5085	10	15	11.9823	12.605	0.0775841	0.62567	0.00274182	0.0407991	1	0.973333	7.34223e-06	0.0245342	0.161547	1	1	-658.274	1433.75	0.0407991	0.05	68.2238	659.961	69.394	738.157	0
PVX_089785_2o2	12.0878	12.1765	12.2091	12.0812	12.1616	12.016	12.36	12.1638	12.1969	12.1887	12.6267	12.3998	12.4012	12.2085	12.4393	12.3487	12.4255	12.4177	12.6992	12.6473	12.9019	13.4684	12.5171	12.6915	12.8284	10	15	12.1641	12.6014	0.0924083	0.306011	0.00330646	0.0445257	1	0.98	4.28297e-06	0.0292221	0.0790117	1	1	-114.686	1418.28	0.0445257	0.05	92.0277	331.192	93.9108	349.836	0
PVX_003985_1o1	11.9672	11.801	11.8731	12.051	11.6992	11.9542	12.3894	12.0217	11.9358	12.0837	12.1207	12.0769	12.8876	11.9623	12.5231	14.6536	12.2338	12.4424	12.9764	12.7944	12.7496	12.5022	12.2671	12.5017	12.3095	10	15	11.9776	12.6001	0.185639	0.643152	0.0034305	0.045589	1	0.926667	0.000118699	0.0587041	0.166061	1	1	-671.286	1412.61	0.045589	0.05	160.81	675.062	167.489	757.414	0.1
PVX_122915_1o1	12.1532	12.2237	12.1451	12.2989	12.2077	12.1638	12.1778	12.1616	12.2352	12.0319	13.0209	12.2093	12.9703	12.2589	12.5659	12.5714	12.3358	12.2791	12.4035	12.6691	12.6356	12.8913	12.3051	12.8761	12.7081	10	15	12.1799	12.58	0.070189	0.274687	0.00308502	0.0431699	1	0.966667	1.16252e-05	0.0221957	0.0709238	1	1	-64.3519	1326.86	0.0431699	0.05	70.8383	293.732	71.9366	308.533	0
PVX_090075_1o2	12.0345	12.0665	12.0757	12.0861	12.1528	12.0587	12.1645	12.0667	12.0674	12.0679	12.1298	12.2771	13.2985	12.1472	12.3201	12.4237	12.7877	12.6318	12.4995	12.4773	13.245	13.2562	12.3443	12.3754	12.2717	10	15	12.0841	12.5657	0.0415193	0.400135	0.00155848	0.0316641	1	0.973333	7.34223e-06	0.0131296	0.103314	1	1	-362.436	1266.29	0.0316641	0.05	39.3345	418.964	39.6941	450.067	0
PVX_114355_2o4	11.8778	11.9446	11.9607	11.8333	11.7549	12.1248	12.1012	11.7536	12.0678	11.8979	12.1532	12.1284	12.637	12.0493	13.6794	12.9618	12.5709	12.4034	12.321	12.4089	12.4526	13.4744	11.8667	12.8892	12.2591	10	15	11.9317	12.5504	0.134285	0.511546	0.000347302	0.0163078	0.733849	0.933333	8.50475e-05	0.0424647	0.132081	1	1	-797.746	1202.21	0.0163078	0.05	113.31	524.77	116.695	575.082	0
PVX_123455_1o1	12.0807	12.0445	12.1871	12.1085	12.1978	12.177	12.0795	12.0713	12.1433	12.083	12.0876	12.1692	13.5073	12.1311	12.2341	12.3288	12.71	12.5125	12.4144	12.4472	13.0786	13.2831	12.3229	12.3925	12.4126	10	15	12.1173	12.5355	0.0547929	0.427984	0.00351178	0.0458048	1	0.92	0.000164588	0.017327	0.110505	1	1	-261.417	1140.67	0.0458048	0.05	53.0403	437.759	53.6812	472.607	0
PVX_091815_2o5	12.0817	12.1646	12.1852	12.1412	12.1372	12.0869	12.3639	12.2079	12.1205	12.1794	12.3215	12.2622	12.9147	12.2338	12.6718	12.3864	12.5211	12.5562	12.9581	12.4769	12.5249	12.4126	12.856	12.5471	12.2668	10	15	12.1669	12.5273	0.0804955	0.234216	0.000711992	0.0242364	1	0.973333	7.34223e-06	0.0254549	0.0604743	1	1	-106.062	1107.29	0.0242364	0.05	80.4192	242.344	81.8507	252.718	0
PVX_097565_2o2	12.2183	12.1619	12.1778	12.2515	11.866	12.2828	12.093	11.9939	11.9542	11.9227	12.2387	12.2495	12.1382	11.995	12.6521	12.1171	13.4455	12.9702	12.3892	12.3426	12.5612	13.4797	12.1637	12.7438	12.3158	10	15	12.0922	12.5202	0.148472	0.463127	0.00402697	0.0485988	1	0.84	0.00360442	0.0469508	0.119579	1	1	-337.962	1077.95	0.0485988	0.05	139.809	467.248	144.434	507.627	0
PVX_096280_1o1	11.8938	11.8057	11.8667	11.7974	11.8975	11.958	11.9935	11.83	11.8625	11.893	13.0313	12.0275	14.8553	12.0216	12.3631	12.2317	12.0277	12.2996	12.3422	12.3852	12.4705	12.6749	12.1895	12.3639	12.4796	10	15	11.8798	12.5176	0.0623311	0.697753	0.00168276	0.0326208	1	1	6.11853e-07	0.0197108	0.180159	1	1	-935.626	1067.45	0.0326208	0.05	51.1389	688.354	51.8424	779.911	0
PVX_117185_1o10	12.1549	11.7998	11.8141	12.0739	12.0008	11.8466	12.0854	12.0464	11.9545	12.0128	12.3175	12.0143	12.7988	12.0824	13.4056	12.1189	13.1009	12.2985	12.2675	12.6255	12.2278	13.4856	12.0658	12.5562	12.2354	10	15	11.9789	12.5067	0.122415	0.483764	0.000546071	0.0206044	1	0.933333	8.50475e-05	0.0387111	0.124907	1	1	-667.721	1023.5	0.0206044	0.05	106.87	482.664	109.777	526.315	0
PVX_118480_4o6	11.9201	11.8701	11.9131	11.8714	11.8906	11.8666	12.0773	11.8498	11.9166	11.9173	11.9065	12.173	12.8321	11.9861	12.0394	12.4562	12.9745	12.8075	12.1863	12.4609	13.7797	13.2366	12.0998	12.3681	12.2736	10	15	11.9093	12.5054	0.0642649	0.52615	0.000249724	0.0146574	0.527667	0.953333	2.75334e-05	0.0203224	0.135851	1	1	-857.868	1018	0.0146574	0.05	53.8021	522.503	54.5653	574.095	0
PVX_095420_3o3	12.0878	12.0893	12.2269	12.1566	12.24	12.276	12.15	12.1222	12.1546	12.1143	12.4574	12.6466	12.6142	12.1622	12.8726	12.3132	12.313	12.2724	12.5328	12.5432	12.7587	12.4904	12.3354	12.4635	12.6213	10	15	12.1618	12.4931	0.0651307	0.193351	0.000200263	0.0128996	0.423156	0.973333	7.34223e-06	0.0205961	0.0499229	1	1	-122.243	968.96	0.0128996	0.05	64.949	196.083	65.8829	202.987	0
PVX_101595_1o1	11.8026	11.7512	11.7317	11.6765	11.609	11.7587	11.8959	11.7133	11.6713	11.6594	11.9198	11.7471	13.6728	12.0956	12.4862	13.7114	11.8845	12.7376	11.9134	12.0668	12.0599	13.9433	12.4769	12.7251	11.7599	10	15	11.727	12.48	0.0817579	0.743878	0.000416414	0.0175977	0.879883	0.953333	2.75334e-05	0.0258541	0.192069	1	1	-1314.53	916.804	0.0175977	0.05	60.2055	712.122	61.2941	813.528	0
PVX_080240_1o6	12.6694	14.3336	13.3494	12.7577	12.3726	12.4222	12.9385	14.2697	12.165	12.3883	14.8572	13.8391	13.7758	13.7731	14.798	12.4854	14.8836	13.994	15.4392	13.0811	12.6182	14.2033	11.9649	14.1667	13.7023	10	15	12.9666	13.8388	0.779775	0.975004	0.0138733	0.0898327	1	0.74	0.0475244	0.246587	0.251745	1	0	3300.42	9855.62	0.0898327	0.05	1257.63	2346.04	1492.05	2793.31	0.8
PVX_085665_1o1	12.9823	12.504	13.9085	14.2568	12.5589	12.295	13.2646	12.3374	12.5084	14.3929	13.0459	13.4962	13.6838	12.6806	14.5667	12.9269	12.5185	12.5064	14.9104	13.7355	12.7296	13.5263	12.2727	13.5443	13.7869	10	15	13.1009	13.3287	0.811862	0.761467	0.456756	0.662154	1	0.6	0.428384	0.256733	0.19661	1	0	4081.14	5492.08	0.662154	0.05	1432.19	1310.74	1711.14	1502.11	0.8
PVX_101215_1o1	12.6271	12.7193	12.6369	12.5966	12.4912	12.6817	12.7443	12.6825	12.5144	12.5971	12.8936	13.4265	12.9557	12.7136	13.4803	12.7773	14.4933	12.8868	12.888	13.0298	13.2041	13.2926	12.6795	13.8409	12.9616	10	15	12.6291	13.1682	0.0825621	0.487552	0.0182179	0.104298	1	0.96	1.83556e-05	0.0261084	0.125885	1	0	1630.66	4409	0.104298	0.05	113.612	769.17	115.687	839.3	1
PVX_003840_2o4	12.3207	13.2558	12.3809	12.3731	12.5418	12.4266	13.147	12.4261	12.3671	12.3254	13.7229	12.4656	12.763	12.8726	13.4655	12.5908	13.8981	12.6581	12.6946	13.0163	12.7941	12.6603	12.6442	15.9609	12.6067	10	15	12.5565	13.1209	0.346597	0.897159	0.0614898	0.208887	1	0.846667	0.00290875	0.109604	0.231645	1	0	1319.51	4111.94	0.208887	0.05	440.684	1321.4	475.468	1551.55	0.5
PVX_119810_1o2	12.6786	12.8213	12.7998	12.6648	12.5562	12.6466	12.9371	12.62	12.6387	12.7227	12.8387	12.8271	13.3704	12.9205	12.9849	12.9543	12.7817	13.1466	13.4102	13.2392	13.3524	13.8095	12.8127	13.2277	13.1103	10	15	12.7086	13.1191	0.113549	0.288128	0.0452148	0.176271	1	0.946667	4.09941e-05	0.0359073	0.0743943	1	0	1989.35	4100.63	0.176271	0.05	164.541	447.145	168.688	470.808	1
PVX_091110_1o1	12.4094	12.4956	12.521	12.4388	12.5974	12.374	12.4066	12.2971	12.3391	12.1808	13.4295	12.5883	12.5014	12.2942	12.935	12.5805	14.3977	13.3072	12.5613	12.8129	12.5546	15.1262	12.4326	13.7801	13.1106	10	15	12.406	13.0941	0.11882	0.80556	0.0131044	0.0891073	1	0.873333	0.00115395	0.0375741	0.207995	1	0	722.935	3948.16	0.0891073	0.05	139.523	1174.01	143.205	1356.08	0.6
PVX_114625_1o1	12.4945	12.0968	12.2789	12.5258	12.734	12.5555	12.7143	12.3435	12.3577	12.2729	13.7878	14.9476	13.8254	12.4572	14.2049	12.4978	13.1875	12.413	12.5117	12.9843	12.4382	13.4002	12.349	12.5358	12.7052	10	15	12.4374	13.083	0.203592	0.793304	0.0193245	0.106335	1	0.773333	0.0225786	0.0643814	0.20483	1	0	842.338	3881.14	0.106335	0.05	242.08	1148.52	253.128	1323.73	0.5
PVX_084520_2o2	12.3053	12.4559	12.2571	12.3006	14.0878	12.5175	12.4476	13.2267	12.2156	12.3897	13.129	12.3907	12.57	12.4034	14.3807	12.6819	12.787	12.7494	12.5507	13.1568	12.3992	14.74	12.7419	14.0435	13.3276	10	15	12.6204	13.0701	0.590569	0.748739	0.114511	0.294762	1	0.78	0.019211	0.186754	0.193324	1	0	1592.45	3803.83	0.294762	0.05	764.547	1078.54	870.208	1233.19	0.6
PVX_123510_1o1	12.1056	12.4319	12.4568	12.2081	13.548	12.5755	14.7177	12.1695	12.2564	12.4082	12.2341	13.1454	13.1118	13.4061	13.1088	12.3466	12.764	12.6982	12.7488	12.9737	13.1566	12.6493	12.5395	13.5178	15.4232	10	15	12.6878	13.0549	0.822856	0.750654	0.226339	0.439168	1	0.746667	0.0412823	0.26021	0.193818	1	0	1893.5	3713.86	0.439168	0.05	1088.85	1069.8	1304.07	1223.63	0.6
PVX_084930_1o3	12.1745	12.2637	12.2928	12.3722	12.3699	12.2947	14.1151	12.3659	12.3199	12.1747	13.6605	12.3155	14.6347	12.2598	14.1963	12.2533	12.412	13.7456	12.5096	13.0599	13.0544	14.1765	12.4179	12.6586	12.3584	10	15	12.4744	13.0475	0.58102	0.822883	0.0522868	0.190486	1	0.78	0.019211	0.183735	0.212468	1	0	986.301	3670.26	0.190486	0.05	680.473	1159.39	772.895	1343.35	0.1
PVX_084120_1o1	12.2579	12.286	12.4546	12.3706	12.4243	12.3362	12.2902	12.2492	12.2669	12.3561	13.2798	12.3123	13.4058	12.5365	13.3019	12.6298	14.908	12.5079	12.4441	12.5417	12.6481	15.4428	12.4226	12.4313	12.8822	10	15	12.3292	13.0463	0.0715111	0.936941	0.0170358	0.0999905	1	0.94	5.93497e-05	0.0226138	0.241917	1	0	441.606	3663.12	0.0999905	0.05	80.0312	1305.94	81.2955	1544.35	0.2
PVX_081840_4o4	12.2788	12.3867	12.5155	14.9394	12.4162	12.318	12.3752	12.3849	12.3876	12.4159	12.3908	12.3941	15.5474	12.4368	12.8305	13.0188	12.8182	14.9479	12.5484	12.5285	12.4241	14.1651	12.4154	12.585	12.3487	10	15	12.6418	13.0266	0.809685	1.01575	0.266867	0.482211	1	0.793333	0.0137226	0.256045	0.262265	1	0	1686.73	3548.51	0.482211	0.05	1039.3	1387.07	1241.13	1663.59	0.6
PVX_087680	12.5928	12.6623	12.4934	12.556	12.4834	12.3402	13.2881	12.8539	12.8556	12.5153	13.007	13.0443	12.7434	12.473	13.0772	13.1992	14.4773	12.6441	12.8339	12.8514	12.5361	12.7471	12.5196	14.6289	12.5836	10	15	12.6641	13.0244	0.272377	0.658878	0.153164	0.348764	1	0.693333	0.115134	0.0861331	0.170122	1	0	1786.17	3535.64	0.348764	0.05	376.157	926.765	399.299	1042.75	0.9
PVX_088845_1o1	12.1416	12.2271	12.5147	12.3293	12.5631	12.387	12.288	12.2917	12.2988	12.3097	12.5957	12.3375	12.547	12.4953	14.8497	12.484	13.5442	13.2772	12.5341	12.8485	14.4401	13.0622	12.547	12.5311	12.7445	10	15	12.3351	12.9892	0.125675	0.752581	0.0135475	0.0895692	1	0.926667	0.000118699	0.039742	0.194316	1	0	462.637	3334.71	0.0895692	0.05	140.39	1024.59	144.312	1172.32	0.3
PVX_115070_1o1	12.1205	12.1997	12.3084	12.2573	11.8359	12.4154	12.6327	12.2485	11.9005	13.5137	12.9196	12.6205	13.2942	13.2429	14.3457	13.2093	12.8747	12.7194	12.4085	13.5783	13.2517	13.2526	12.1064	12.5384	12.3131	10	15	12.3432	12.9784	0.471433	0.569018	0.0102876	0.0793343	1	0.826667	0.00542836	0.14908	0.14692	1	0	491.955	3273.84	0.0793343	0.05	510.138	781.363	565.673	865.128	0.3
PVX_091560_1o1	12.3515	12.7256	12.5417	12.9	12.5884	12.6262	14.9513	12.5169	12.3823	12.3319	13.8252	12.8657	12.8935	12.7148	13.0753	13.0791	12.5807	12.5527	13.5797	13.0217	13.4641	13.0758	12.3642	12.6487	12.8568	10	15	12.7916	12.9732	0.778863	0.403076	0.469835	0.669879	1	0.753333	0.0357163	0.246298	0.104074	1	0	2385.75	3245.05	0.669879	0.05	1112.73	559.651	1319.88	601.515	0.7
PVX_095415_1o1	12.0324	12.1497	12.2532	12.0764	12.7949	12.2823	12.1524	12.0954	12.1255	11.9594	14.251	12.0804	13.3657	12.0439	12.3406	12.7354	13.4912	12.0947	12.1338	12.2691	12.2243	13.6763	13.7763	14.2483	13.6469	10	15	12.1922	12.9585	0.232244	0.841829	0.00714297	0.067208	1	0.773333	0.0225786	0.0734421	0.217359	1	0	-24.6336	3163.74	0.067208	0.05	232.261	1113.28	244.39	1294.31	0.1
PVX_082670_1o1	12.2169	12.448	12.4605	12.289	12.2732	12.3051	12.4271	12.3985	12.4665	12.4406	12.7936	15.0132	14.4882	12.2947	13.2456	12.2694	13.9555	12.4218	12.4141	12.641	12.4544	12.9	12.441	12.4268	12.4905	10	15	12.3725	12.95	0.0919838	0.857395	0.0385811	0.16111	1	0.76	0.0307823	0.0290878	0.221379	1	0	598.562	3116.7	0.16111	0.05	105.846	1125.64	108.002	1312.32	0.6
PVX_091840_1o1	11.9526	12.0398	12.4982	12.572	12.1012	12.9586	12.1364	12.33	12.2018	12.2994	12.8016	12.2342	12.1493	12.1111	12.3213	12.8702	14.2541	12.1745	13.2355	14.5618	12.5301	13.4895	12.1746	13.2053	13.7156	10	15	12.309	12.9219	0.300268	0.800478	0.0243865	0.121295	1	0.746667	0.0412823	0.0949531	0.206683	1	0	370.075	2964.25	0.121295	0.05	323.222	1035.8	345.211	1195.35	0.3
PVX_118660_1o1	12.2039	12.2424	12.3688	12.3405	12.426	12.4832	12.3229	12.2228	12.2317	12.1791	13.3211	12.9537	12.3103	12.2627	14.5018	13.8176	13.5211	12.2277	12.1537	13.2725	12.4187	13.1774	12.1885	13.3306	12.2727	10	15	12.3021	12.9153	0.102251	0.720394	0.0150489	0.093601	1	0.713333	0.0804562	0.0323346	0.186005	1	0	345.975	2928.96	0.093601	0.05	111.93	934.457	114.467	1063.05	0.2
PVX_115275_2o4	12.1259	12.3546	12.1762	12.1899	12.8297	12.3538	14.179	12.3199	12.2983	12.2101	14.5953	12.492	12.7453	13.3439	12.9806	12.3834	12.9021	12.653	12.6438	12.9707	12.7545	12.5987	12.7068	13.2066	12.4993	10	15	12.5037	12.8984	0.62078	0.539208	0.107839	0.287344	1	0.846667	0.00290875	0.196308	0.139223	1	0	1103.41	2838.81	0.287344	0.05	738.845	702.354	846.541	773.511	0.2
PVX_001665_1o1	11.9612	11.8251	13.451	11.9063	11.8028	11.9585	15.0128	11.898	11.9382	11.9714	14.7413	12.0132	13.3645	12.2452	12.7264	13.6202	13.38	13.398	13.8779	12.1887	12.8681	12.1439	11.9093	12.666	12.1093	10	15	12.3725	12.8835	1.04834	0.825534	0.120193	0.304884	1	0.793333	0.0137226	0.331513	0.213152	1	0	598.515	2760.21	0.304884	0.05	1088.65	1037.86	1369.88	1203.11	0.2
PVX_098920_3o3	12.4287	12.7409	12.6005	12.398	12.4139	12.2512	12.5166	12.2209	12.2404	12.3097	12.5207	12.2988	13.8147	12.3698	13.9148	12.4614	13.0433	12.9617	12.6673	12.6792	12.6009	12.9975	12.4595	13.8727	12.471	10	15	12.4121	12.8756	0.169113	0.559768	0.037979	0.160316	1	0.82	0.00660312	0.0534783	0.144531	1	0	745.854	2718.83	0.160316	0.05	198.329	716.38	205.818	791.866	0.6
PVX_080490_1o3	12.2425	12.2382	12.3879	12.39	12.3549	12.3321	12.6051	14.8551	12.9512	12.4299	13.6897	12.2877	12.9718	12.3852	12.9134	12.4444	13.2904	12.3062	12.8852	12.4266	12.458	14.0386	12.3139	12.4157	14.21	10	15	12.6787	12.8691	0.792686	0.653426	0.493032	0.687857	1	0.646667	0.237953	0.250669	0.168714	1	0	1852.15	2685.39	0.687857	0.05	1045.71	825.698	1244.14	928.131	0.6
PVX_111445_1o1	12.0983	12.154	12.0506	11.9917	12.0837	12.1484	13.2914	12.8864	13.4285	12.1906	12.8972	13.1254	12.5059	12.1662	13.0601	13.0639	14.3948	12.0691	12.6943	12.7293	12.3895	12.6719	12.2083	14.5889	12.4491	10	15	12.4324	12.8676	0.550341	0.737977	0.105379	0.282659	1	0.726667	0.0622836	0.174033	0.190545	1	0	823.116	2677.43	0.282659	0.05	628.124	924.67	708.655	1055.23	0.3
PVX_081265_1o1	12.2416	12.2849	12.4074	12.3551	12.4242	12.4234	12.2224	12.2821	12.3094	12.1736	12.6912	13.6939	12.5892	12.2858	14.3251	13.191	13.1962	12.2884	12.2663	12.7687	12.3675	12.6796	12.3022	13.5071	12.8146	10	15	12.3124	12.8645	0.0880126	0.608873	0.0157775	0.0957987	1	0.833333	0.00443532	0.027832	0.15721	1	0	382.069	2661.25	0.0957987	0.05	97.1837	769.922	99.0767	858.563	0.3
PVX_122065_1o1	12.3688	12.5043	12.5043	12.2239	12.3121	12.2763	13.8056	12.588	12.3653	12.3617	12.4842	12.8054	12.6016	12.5539	12.8383	12.4364	12.9169	12.6137	14.3417	12.9022	12.8951	13.719	12.5055	12.7177	12.5959	10	15	12.531	12.8618	0.46175	0.514117	0.148736	0.341935	1	0.853333	0.00233422	0.146018	0.132744	1	0	1214.26	2647.69	0.341935	0.05	569.71	654.353	630.39	717.418	0.4
PVX_099160_1o1	12.1197	12.1979	12.5048	12.3673	12.4322	12.4017	12.5949	12.2791	12.2954	12.2569	12.8974	15.5111	12.4125	12.3443	12.3586	12.4998	12.5196	12.9573	12.8843	12.9288	12.6631	12.792	12.502	12.7094	12.8117	10	15	12.345	12.8528	0.143862	0.765486	0.0452117	0.176271	1	0.88	0.000899424	0.0454933	0.197648	1	0	498.254	2601.22	0.176271	0.05	161.494	947.077	166.668	1086.13	0.4
PVX_084090_1o1	12.2918	12.6195	12.4532	12.4318	12.4276	12.4153	15.3684	12.5008	12.4908	12.3511	12.5478	13.8516	13.0464	12.8578	13.6382	12.8677	12.4902	12.8655	12.3558	13.1961	12.6439	12.6236	12.261	12.8064	12.5081	10	15	12.735	12.8373	0.929414	0.447658	0.696781	0.841713	1	0.76	0.0307823	0.293907	0.115585	1	0	2113.32	2522.42	0.841713	0.05	1256.55	563.471	1540.47	610.472	0.8
PVX_097935_2o2	12.5252	12.2777	12.2601	12.4204	12.3524	12.1865	12.6015	12.3991	12.3561	12.2134	12.2709	12.1336	13.2668	13.9918	12.2052	12.7202	12.7386	12.5074	12.6574	12.7646	12.6909	15.09	12.637	12.4688	12.3762	10	15	12.3592	12.8346	0.133011	0.774006	0.061346	0.208832	1	0.773333	0.0225786	0.0420616	0.199848	1	0	549.875	2508.64	0.208832	0.05	150.973	944.929	155.439	1085.32	0.4
PVX_001945_1o1	12.283	12.3366	12.3644	12.3351	12.3466	12.216	12.5268	12.4917	12.3512	12.4287	14.239	12.4823	12.6017	12.45	12.6012	12.4604	13.032	12.5865	12.6685	12.617	12.5293	14.7036	12.4955	12.5501	12.3708	10	15	12.368	12.8259	0.0926876	0.689979	0.0533022	0.192856	1	0.933333	8.50475e-05	0.0293104	0.178152	1	0	581.911	2464.39	0.192856	0.05	106.313	843.425	108.495	954.279	0.3
PVX_079760_2o2	12.0398	11.8798	12.0364	12.1445	11.5173	12.1463	12.5334	12.2722	11.6835	11.6069	13.231	13.016	14.177	11.7662	14.894	11.9937	14.7117	12.0455	12.0985	11.9173	11.9229	13.8253	11.4725	12.5583	12.5077	10	15	11.986	12.8092	0.316925	1.11652	0.0139895	0.0901213	1	0.706667	0.0909715	0.100221	0.288285	1	0	-647.826	2380.86	0.0901213	0.05	272.227	1299.94	291.81	1587.47	0.1
PVX_082470_1o1	12.2887	12.3066	13.587	12.6873	12.3209	12.1363	12.5106	12.3974	12.4448	12.3185	13.0465	12.4444	12.5953	12.9292	12.8724	13.4008	12.3543	12.4306	12.3874	12.4327	12.4398	13.4408	13.0689	13.8443	12.384	10	15	12.4998	12.8047	0.409547	0.4727	0.150623	0.34519	1	0.74	0.0475244	0.12951	0.122051	1	0	1087.62	2358.85	0.34519	0.05	497.282	580.409	543.988	631.648	0.5
PVX_100835_2o2	12.0303	12.1169	12.2619	11.9718	11.9949	12.0327	13.0713	12.0072	12.1349	12.0091	13.1184	12.9387	14.806	12.4166	14.4082	12.1104	12.2789	12.2082	12.2718	12.54	12.3873	12.1776	11.972	13.571	12.8277	10	15	12.1631	12.8022	0.330833	0.851903	0.0210838	0.112785	1	0.84	0.00360442	0.104618	0.21996	1	0	-118.017	2346.24	0.112785	0.05	320.805	1010.01	344.932	1176.36	0.1
PVX_099495_1o1	12.4039	12.5629	12.3518	12.403	12.2662	12.3362	12.4159	12.2087	12.3407	12.3548	12.6281	13.6601	12.4426	12.3528	13.8028	12.3691	12.2151	12.6648	12.8232	13.9709	12.8269	12.784	12.3555	12.6385	12.3668	10	15	12.3644	12.7934	0.0946506	0.562639	0.0435741	0.173264	1	0.82	0.00660312	0.0299312	0.145273	1	0	568.721	2302.85	0.173264	0.05	108.27	680.025	110.54	752.066	0.4
PVX_123475_1o1	12.2953	12.378	12.5667	12.4063	12.4443	12.3862	12.3452	12.2768	13.2076	12.3434	13.4474	12.2746	12.3011	12.8579	12.9518	12.7728	12.4337	12.4899	12.4301	13.0011	12.5622	14.1107	12.449	13.086	12.7234	10	15	12.465	12.7928	0.273424	0.490133	0.109519	0.28939	1	0.76	0.0307823	0.0864643	0.126552	1	0	949.462	2299.84	0.28939	0.05	328.888	595.934	349.202	650.569	0.4
PVX_097590_1o1	12.3884	12.4152	12.4433	12.3312	12.3889	12.3575	14.7841	12.3991	12.3215	12.3222	12.4458	12.7431	12.4613	12.3862	13.715	12.5378	12.6227	12.4196	12.6394	13.4241	12.7517	12.6162	12.4462	13.9477	12.6452	10	15	12.6152	12.7868	0.763189	0.49367	0.483997	0.682245	1	0.86	0.00185881	0.241341	0.127465	1	0	1569.64	2270.5	0.682245	0.05	966.444	597.566	1142.43	652.765	0.6
PVX_122555_4o4	12.3925	12.3617	12.2976	12.4241	12.4806	12.4133	12.5342	13.7861	12.45	12.4812	12.5262	12.4394	13.1602	12.4585	13.2307	12.5791	12.8409	12.6815	12.5398	13.1236	13.3571	13.0819	12.3808	13.0956	12.2145	10	15	12.5622	12.7806	0.435222	0.364883	0.275471	0.494118	1	0.74	0.0475244	0.137629	0.0942124	1	0	1343.36	2240.38	0.494118	0.05	550.264	444.825	605.343	474.843	0.8
PVX_111045_1o1	12.0812	12.1239	12.1134	12.1795	12.1256	12.1343	12.719	12.1994	12.1512	12.1313	13.1442	12.7931	14.7633	12.1276	13.8963	12.3001	12.3339	12.1511	12.6057	13.3169	12.2	12.5723	12.1453	13.0911	12.2396	10	15	12.1959	12.7787	0.186774	0.75842	0.0200062	0.108951	1	0.866667	0.00147089	0.0590632	0.195823	1	0	-12.6045	2230.92	0.108951	0.05	188.196	891.915	196.06	1021.58	0.1
PVX_118400_3o3	12.2378	12.2175	12.3345	12.3377	12.311	12.2579	12.5286	12.3231	12.2178	12.3262	12.6808	14.2506	12.5421	12.5258	12.7106	12.5831	12.4154	12.4981	13.0999	12.483	12.3867	13.0912	12.3178	12.6101	12.7216	10	15	12.3092	12.7278	0.0910312	0.477851	0.0296908	0.138186	1	0.933333	8.50475e-05	0.0287866	0.123381	1	0	370.783	1987.25	0.138186	0.05	100.261	556.009	102.281	605.652	0.1
PVX_084675_1o1	12.2014	11.6561	11.7094	11.681	11.5438	11.7034	11.8453	11.9228	11.8515	11.442	13.4651	12.4464	11.8209	11.5022	15.4497	11.8145	12.1427	11.7515	15.2563	12.2702	11.9321	13.0684	11.6337	12.0809	14.2572	10	15	11.7557	12.7261	0.212777	1.30363	0.0092774	0.0751232	1	0.786667	0.0162759	0.0672859	0.336595	1	0	-1246.42	1979.4	0.0751232	0.05	157.568	1409.94	165.091	1780.43	0
PVX_089310_2o6	12.3146	12.4025	12.5659	12.915	12.5295	13.3603	13.1873	12.4971	12.4678	12.3549	13.3074	12.3937	12.6569	12.3173	14.4179	12.3647	12.4508	12.6286	12.7654	12.4012	12.6794	12.4659	12.2551	13.0131	12.4026	10	15	12.6595	12.7013	0.365391	0.552598	0.846073	0.922949	1	0.526667	0.848957	0.115547	0.14268	1	0	1765.47	1863.96	0.922949	0.05	497.959	627.152	539.482	692.347	0.8
PVX_114150_1o1	12.6093	12.5271	12.2674	12.3549	12.2707	12.1076	12.4847	12.1994	12.1716	12.2829	13.4752	12.4522	12.6725	12.2489	13.2176	12.4171	12.239	12.3514	12.7182	12.5733	12.5537	12.5515	12.2982	13.6608	13.0579	10	15	12.3276	12.6992	0.164178	0.448886	0.0447904	0.175588	1	0.793333	0.0137226	0.0519176	0.115902	1	0	435.755	1853.91	0.175588	0.05	181.683	513.35	188.34	556.292	0.3
PVX_083265_1o1	12.2208	12.2	12.3533	12.268	12.2639	12.3665	12.1904	12.3639	12.4393	12.3078	12.4732	12.3321	12.4534	12.21	13.9147	12.0749	12.3867	13.8496	12.151	12.4177	12.3572	12.277	12.0663	15.1829	12.27	10	15	12.2974	12.6944	0.0825561	0.894504	0.136805	0.325529	1	0.62	0.33826	0.0261065	0.23096	1	0	329.398	1832.26	0.325529	0.05	90.2684	980.556	91.9168	1150.8	0.1
PVX_003665_1o1	12.3544	12.3547	12.3761	12.3033	12.4321	12.3455	12.3336	12.3958	12.2824	12.3654	14.296	12.3337	12.3634	12.4086	14.1262	12.3657	12.4048	12.3982	12.3651	12.3933	12.4398	12.5285	12.4558	13.2086	12.3228	10	15	12.3543	12.694	0.0430062	0.652847	0.118162	0.301278	1	0.793333	0.0137226	0.0135997	0.168564	1	0	532.022	1830.3	0.301278	0.05	49.1286	730.715	49.5939	821.279	0.2
PVX_118685_2o2	12.4203	12.417	12.3576	12.4398	12.4603	12.4497	12.6043	13.1134	12.4218	12.5732	12.5062	12.9326	12.5599	12.5423	14.0041	12.6052	12.5995	12.5598	12.7891	12.5795	12.5642	12.6759	12.5819	12.4952	12.4109	10	15	12.5257	12.6937	0.219407	0.383207	0.350715	0.574537	1	0.753333	0.0357163	0.0693827	0.0989436	1	0	1192.57	1829.05	0.574537	0.05	276.882	439.142	290.523	470.316	0.9
PVX_093530_1o1	12.0478	11.8145	11.8383	11.949	11.8546	11.8014	12.043	12.0817	12.1823	11.986	13.5714	12.1509	12.081	12.0837	15.4125	12.1195	12.4414	11.9755	12.131	12.1966	11.8558	12.4312	11.8941	15.4705	12.5163	10	15	11.9599	12.6888	0.129899	1.19012	0.0304475	0.140022	1	0.846667	0.00290875	0.0410776	0.307288	1	0	-720.687	1806.22	0.140022	0.05	111.824	1266.6	115.054	1567.27	0
PVX_092540_1o1	11.8752	11.8059	12.023	11.8409	11.8199	11.9956	11.9642	12.0213	11.8297	11.7002	14.8341	12.3221	12.5369	11.6504	12.6947	11.861	12.6351	11.9505	12.2381	12.6406	12.0577	12.8505	11.6944	15.7995	12.5504	10	15	11.8876	12.6877	0.108426	1.14597	0.0148643	0.093601	1	0.806667	0.00961649	0.0342875	0.295889	1	0	-915.346	1801.51	0.093601	0.05	88.9869	1223.4	91.1271	1501.9	0
PVX_113805_2o2	11.9896	11.8723	11.8727	12.0668	12.1431	12.1538	12.1948	12.0954	12.0114	12.1134	12.3866	12.5926	12.7628	12.0299	14.5431	13.2989	12.4575	12.5273	12.1425	12.156	12.7924	12.1679	12.1805	13.9961	12.2668	10	15	12.0513	12.6867	0.113002	0.728987	0.00729866	0.0676406	1	0.92	0.000164588	0.0357344	0.188224	1	0	-459.937	1796.9	0.0676406	0.05	103.837	806.425	106.442	918.808	0
PVX_097980_4o4	12.7157	12.5926	12.6647	12.6587	12.6063	12.4383	12.4575	12.4525	12.3488	12.4882	12.5211	12.4759	13.8872	12.4105	12.5019	12.4569	13.3479	12.5592	12.6299	12.7339	12.4149	12.5757	12.6008	12.4954	12.457	10	15	12.5423	12.6712	0.12095	0.406596	0.465866	0.667826	1	0.533333	0.806542	0.0382479	0.104983	1	0	1260.82	1726.3	0.667826	0.05	156.065	457.771	160.258	492.324	0.9
PVX_117905_1o1	12.4217	12.4341	12.4687	12.4636	12.5484	12.4836	12.287	12.4401	12.3346	12.333	12.4415	12.3578	13.0148	12.4398	12.5104	12.4711	12.7375	12.3604	12.4422	12.5797	14.4705	12.709	12.4526	12.5762	12.471	10	15	12.4215	12.669	0.0802398	0.526865	0.19425	0.402337	1	0.76	0.0307823	0.0253741	0.136036	1	0	781.524	1716.2	0.402337	0.05	95.6404	586.007	97.3374	643.952	0.7
PVX_089990_1o10	12.3744	12.3133	12.1893	12.3217	14.348	12.2432	12.4034	12.2971	12.1149	12.2196	12.6873	12.2739	13.4364	12.2347	13.6896	12.2428	12.8345	12.3593	12.5005	13.4399	12.3593	12.5191	12.422	12.4761	12.5483	10	15	12.4825	12.6682	0.66116	0.473162	0.39176	0.60822	1	0.76	0.0307823	0.209077	0.12217	1	0	1018.49	1712.97	0.60822	0.05	772.055	528.51	892.456	575.215	0.2
PVX_081665_1o1	12.2104	12.3733	12.6001	12.3682	12.4154	12.3688	12.8896	12.5069	12.3065	12.202	12.4765	12.5747	12.8812	12.636	12.6563	12.4443	12.3942	13.3213	12.5649	12.653	12.9047	12.8602	12.266	12.7448	12.6128	10	15	12.4241	12.666	0.203375	0.25608	0.116337	0.297244	1	0.806667	0.00961649	0.0643129	0.0661196	1	0	791.547	1703.04	0.297244	0.05	239.614	291.14	250.537	304.793	0.4
PVX_113890_1o1	12.3897	12.329	12.5649	12.3662	12.266	12.1383	12.8811	12.4175	12.2257	12.2481	12.752	12.4062	12.6584	12.2327	13.3931	12.3331	12.3211	12.3936	13.4716	12.5417	12.6356	12.5452	12.3	13.5353	12.4659	10	15	12.3827	12.6657	0.211372	0.439544	0.109769	0.28939	1	0.733333	0.05451	0.0668417	0.11349	1	0	635.836	1701.51	0.28939	0.05	241.769	491.553	253.234	531.782	0.4
PVX_116675_1o1	12.2502	12.3707	12.2617	12.4372	12.2815	12.3	12.2892	12.347	12.1814	12.114	12.4095	12.2385	12.4051	12.0947	12.5743	14.2424	12.6097	12.425	12.3039	12.6179	12.3688	12.9773	12.1083	13.776	12.5148	10	15	12.2833	12.6444	0.0920774	0.602091	0.0731359	0.230713	1	0.76	0.0307823	0.0291174	0.155459	1	0	280.443	1606.33	0.230713	0.05	99.5964	654.035	101.627	728.449	0.1
PVX_094650_2o2	14.5455	12.2404	12.9451	12.426	12.4697	13.9279	14.0482	12.3022	12.3906	12.3193	12.6362	12.3029	13.439	12.4164	12.9047	12.3762	13.0966	12.369	12.4307	12.5487	12.4661	12.6544	12.5443	12.6943	12.6706	10	15	12.9615	12.6367	0.872161	0.306947	0.153855	0.349565	1	0.52	0.891812	0.275801	0.0792534	1	0	3271.97	1572.03	0.349565	0.05	1387.93	340.397	1680.33	359.619	0.7
PVX_091505_1o1	12.4027	12.4164	12.2919	12.4209	12.4693	12.432	12.4938	12.4424	12.4633	12.43	12.5192	12.3547	12.5969	12.3537	13.0766	12.9169	12.3701	12.3053	12.4615	12.4714	12.4943	13.547	12.2849	12.4222	13.1564	10	15	12.4263	12.6221	0.0545949	0.375251	0.216151	0.428853	1	0.626667	0.311045	0.0172644	0.0968893	1	0	799.758	1507.9	0.428853	0.05	65.473	409.468	66.2612	437.911	0.9
PVX_001770_1o1	12.4255	12.4253	12.3487	12.4842	12.4812	12.4427	12.5611	12.5679	12.4972	12.582	12.4835	12.6471	12.7194	12.4882	12.9102	12.6695	12.6242	12.7846	12.597	12.5302	12.3939	12.6682	12.4105	12.9614	12.4234	10	15	12.4816	12.6207	0.0742474	0.173529	0.301008	0.520908	1	0.74	0.0475244	0.0234791	0.0448049	1	0	1014.84	1502.15	0.520908	0.05	92.3222	192.597	93.837	198.672	0.9
PVX_111255_1o1.DUP	12.3765	12.3614	12.428	12.3879	12.4274	12.2218	12.4072	12.4187	12.3033	12.3444	12.4186	12.4908	12.4337	12.3773	12.5465	12.4061	12.4019	14.652	12.4939	12.5091	12.4127	12.5607	12.4396	12.8938	12.2333	10	15	12.3677	12.618	0.0648498	0.580051	0.193307	0.401629	1	0.813333	0.00799141	0.0205073	0.149769	1	0	580.631	1490.16	0.401629	0.05	74.5912	619.862	75.6591	687.669	0.5
PVX_116975_2o2	12.3525	12.2723	12.3873	12.4355	12.3819	12.2385	12.422	12.3413	12.2244	12.3243	12.1688	12.4517	12.2936	12.4127	15.0272	12.505	12.7023	12.4593	12.3929	12.8693	12.4544	12.3128	12.3648	12.7334	12.0903	10	15	12.338	12.6159	0.0733779	0.697733	0.198696	0.406039	1	0.72	0.070918	0.0232041	0.180154	1	0	473.092	1481.02	0.406039	0.05	82.606	736.884	83.9454	834.893	0.3
PVX_002770_1o1.DUP	12.5967	12.5862	12.5948	12.5034	12.6351	12.5112	12.4611	12.4496	12.4427	12.6068	12.5977	12.5203	12.5843	12.5748	12.6777	12.5598	12.5902	12.5216	12.5994	12.5782	12.6476	12.6799	12.752	12.6459	12.5868	10	15	12.5388	12.6078	0.072951	0.0625214	0.60611	0.771048	1	0.72	0.070918	0.0230691	0.016143	1	0	1246.13	1445.69	0.771048	0.05	94.392	69.4535	95.9134	70.235	1
PVX_113355_16o20	12.0794	12.1075	12.1867	12.0287	12.0676	12.1684	12.3446	12.2421	12.17	12.1139	12.6027	12.2035	12.5909	12.2943	12.4606	12.2126	12.2536	12.2767	12.5332	12.6066	12.7256	14.6741	12.3196	12.5382	12.8156	10	15	12.1509	12.6072	0.0931087	0.603276	0.0226594	0.117351	1	0.946667	4.09941e-05	0.0294436	0.155765	1	0	-156.707	1443.22	0.117351	0.05	91.8693	638.561	93.7635	711.365	0
PVX_088860_1o1	12.5108	12.3268	12.5503	12.3896	12.5154	12.3188	12.3591	12.2975	12.2828	12.261	12.9532	12.2366	12.2398	12.3913	13.6974	12.2435	12.4343	12.2344	12.3294	12.4103	12.3265	13.2376	12.2883	12.762	13.2386	10	15	12.3812	12.6016	0.106415	0.466321	0.194225	0.402337	1	0.546667	0.72343	0.0336515	0.120404	1	0	630.498	1418.92	0.402337	0.05	122.996	497.64	125.898	540.954	0.4
PVX_091135_2o5	11.9917	12.0114	12.9816	12.8246	12.3456	12.273	12.2898	12.1563	12.1409	12.1103	12.1606	12.1024	13.1971	12.1943	12.1042	12.1952	13.1637	12.5518	12.2282	12.4416	12.4588	13.0957	12.2688	14.4727	12.3469	10	15	12.3125	12.5988	0.333567	0.643718	0.171464	0.375398	1	0.673333	0.160023	0.105483	0.166207	1	0	382.48	1407.06	0.375398	0.05	358.649	675.018	385.854	757.441	0.2
PVX_115395_1o1.DUP	12.6826	12.5389	12.5852	12.5761	12.513	12.372	12.6921	12.5229	12.4659	12.6423	12.5598	12.7124	12.6637	12.5282	12.724	12.5169	12.4656	12.5711	12.5692	12.8308	12.5548	12.6985	12.4766	12.6565	12.3647	10	15	12.5591	12.5928	0.0990949	0.120604	0.793523	0.895883	1	0.573333	0.567058	0.0313366	0.0311398	1	0	1330.58	1381.52	0.895883	0.05	129.669	131.913	132.516	134.791	0.9
PVX_088240_10o10	12.0512	12.192	12.1826	12.0555	12.1887	12.3545	12.2692	12.1905	12.1505	12.1002	12.2089	12.1544	14.0946	12.2359	12.5852	12.8192	12.7916	12.2637	12.4947	12.3958	13.1671	12.396	12.282	12.506	12.3127	10	15	12.1735	12.5805	0.0928912	0.501334	0.0177644	0.102861	1	0.906667	0.000302255	0.0293748	0.129444	1	0	-84.8721	1328.97	0.102861	0.05	93.1047	525.635	95.0198	574.978	0
PVX_085005_2o2	12.2088	12.2032	12.2524	12.2575	12.3746	12.2638	12.2489	12.302	12.2895	12.2395	12.3572	12.2261	12.2728	12.4439	13.0206	12.3009	13.1122	12.294	12.4214	12.4906	12.4908	12.4207	12.3287	14.1478	12.3566	10	15	12.264	12.579	0.0495242	0.504436	0.0613747	0.208832	1	0.88	0.000899424	0.0156609	0.130245	1	0	214.264	1322.35	0.208832	0.05	53.1036	528.171	53.6832	578.072	0
PVX_098080_1o1	12.5364	12.2374	12.4522	12.4003	12.7515	12.4633	12.3213	12.2419	12.7944	12.3152	12.5527	12.2593	12.5981	12.3893	12.9344	12.3172	12.5101	12.4122	12.454	12.4596	12.6008	13.5523	12.4486	12.3689	12.7967	10	15	12.4514	12.5769	0.195171	0.322131	0.376899	0.595562	1	0.64	0.260896	0.0617186	0.0831738	1	0	896.447	1313.78	0.595562	0.05	234.547	342.287	244.798	362.6	0.6
PVX_089825_2o2.DUP	12.2238	12.313	12.3014	12.3321	12.5427	12.423	12.2756	12.3103	12.3312	12.3183	12.6736	12.4605	12.4644	12.6168	12.3776	12.3594	13.2728	12.4298	12.4261	12.4667	12.4816	12.7172	12.5226	12.6198	12.6702	10	15	12.3371	12.5706	0.0877181	0.224663	0.0586212	0.201409	1	0.926667	0.000118699	0.0277389	0.0580078	1	0	469.981	1286.99	0.201409	0.05	98.5357	239.739	100.449	249.575	0.2
PVX_086000_1o2	12.2597	12.3284	12.271	12.3527	12.2873	12.2373	12.436	12.4347	12.3199	12.2496	12.478	12.4175	12.5661	12.4058	13.1435	12.4556	12.4666	12.5417	12.3389	12.4478	12.8915	13.1443	12.2763	12.4257	12.5283	10	15	12.3177	12.5685	0.0719591	0.270255	0.048793	0.184753	1	0.9	0.000402599	0.0227555	0.0697796	1	0	400.615	1278.14	0.184753	0.05	79.8871	286.807	81.1571	301.02	0.2
PVX_089765_2o2	12.0324	12.0802	12.1544	12.2354	12.4279	12.317	12.3576	12.1451	12.2705	12.3236	12.4672	12.3053	12.5297	12.2623	13.3119	12.3732	12.5666	12.5606	12.4499	12.5659	12.9018	12.6788	12.4288	12.5817	12.4442	10	15	12.2344	12.5619	0.128074	0.258767	0.00928805	0.0751232	1	0.933333	8.50475e-05	0.0405005	0.0668134	1	0	114.364	1250.25	0.0751232	0.05	133.391	273.633	137.189	286.603	0.1
PVX_122180_1o1	12.1604	12.1991	12.2067	12.1599	12.2471	12.2902	13.1029	12.3266	12.2654	12.2172	12.4488	12.4235	13.1416	12.3054	12.3536	12.1726	12.2538	13.2675	12.2178	12.5567	12.4249	12.552	12.2815	13.5007	12.5269	10	15	12.3175	12.5618	0.281103	0.407078	0.109981	0.28939	1	0.806667	0.00961649	0.0888925	0.105107	1	0	400.199	1250.05	0.28939	0.05	305.021	424.83	324.407	456.936	0.1
PVX_092900_1o1	11.9161	12.1916	12.1133	12.4025	12.0991	12.1951	12.2155	12.1915	12.1481	12.0311	12.1297	12.0545	13.6892	12.3166	12.3432	12.6706	12.2084	12.4737	12.367	12.4418	13.3629	13.1099	12.2917	12.5798	12.3655	10	15	12.1504	12.5603	0.1275	0.468565	0.0110903	0.0830989	1	0.86	0.00185881	0.0403189	0.120983	1	0	-158.247	1243.73	0.0830989	0.05	125.288	485.843	128.839	528.343	0.1
PVX_121865_2o2	11.783	11.8178	12.184	11.9659	11.9872	12.0643	12.0475	12.0654	11.9921	11.9271	12.0807	12.0449	14.7893	12.028	13.7335	11.9703	12.088	12.5721	12.2667	12.3831	13.504	12.2551	12.1105	12.2665	12.3032	10	15	11.9834	12.5597	0.119598	0.808505	0.0136915	0.0897384	1	0.886667	0.000693841	0.0378203	0.208755	1	0	-655.042	1241.33	0.0897384	0.05	104.771	813.348	107.554	939.979	0
PVX_089695_1o1	12.4602	12.4432	12.5916	12.4177	12.4456	12.3617	12.3506	12.8617	12.2594	12.3196	12.647	13.2941	12.6723	12.3803	12.7082	12.4019	12.4614	12.4093	12.4622	12.4609	12.4388	12.6094	12.3304	12.5746	12.5031	10	15	12.4511	12.5569	0.170545	0.233482	0.373858	0.593311	1	0.7	0.102507	0.0539309	0.0602848	1	0	895.448	1229.66	0.593311	0.05	205.465	246.608	213.291	257.131	0.6
PVX_089550_1o1	12.4475	12.4781	12.4964	12.1847	12.2972	12.2159	12.3615	12.2425	12.2718	12.2896	12.1879	12.353	12.5284	12.3004	12.5425	12.3951	12.257	12.3834	12.7165	12.7099	12.7353	12.8525	12.3716	12.6049	13.3577	10	15	12.3285	12.5531	0.1117	0.297198	0.0680419	0.220849	1	0.78	0.019211	0.0353226	0.0767363	1	0	439.121	1213.49	0.220849	0.05	124.4	311.298	127.484	328.304	0.3
PVX_092200_1o1	12.0203	12.58	12.256	11.9371	12.0465	12.1079	11.9885	11.9359	14.1216	11.8626	11.9324	12.0125	12.1891	11.9024	12.3573	12.0853	14.5595	12.5335	12.1994	12.3911	14.4247	12.0743	12.5464	12.2033	12.8476	10	15	12.2856	12.5506	0.677287	0.828473	0.307492	0.529096	1	0.666667	0.177495	0.214177	0.213911	1	0	288.547	1203.18	0.529096	0.05	688.82	826.727	799.061	958.861	0.2
PVX_111180	12.4755	12.6299	12.4816	12.7558	12.5832	12.6028	12.8936	12.4541	12.5372	13.5	12.4587	12.5609	12.814	12.4714	12.5111	12.5533	12.3874	12.4271	12.5296	12.5862	12.5575	12.9052	12.3612	12.504	12.608	10	15	12.6914	12.549	0.314987	0.145514	0.275931	0.494523	1	0.66	0.19628	0.0996077	0.0375716	1	0	1910.09	1196.72	0.494523	0.05	441.265	154.056	472.808	158.12	1
PVX_082390_1o1	12.206	12.2089	12.1475	12.0972	12.0793	12.22	12.3743	12.1177	12.2493	12.2289	14.8569	12.2737	12.3161	12.0797	14.2605	12.2904	12.0783	12.1291	12.2628	12.439	12.2823	12.4516	11.8497	12.1371	12.436	10	15	12.1929	12.5429	0.0871327	0.841603	0.13157	0.318653	1	0.68	0.143842	0.0275538	0.217301	1	0	-22.2766	1171.28	0.318653	0.05	88.5721	834.407	90.2799	970.045	0
PVX_113385_1o4	12.3477	12.1248	12.2235	12.1963	12.1119	12.1144	12.2781	12.1459	12.1816	12.1074	12.2332	12.2988	12.5552	12.2029	13.3567	12.2914	12.5188	12.3008	12.4332	13.1676	12.5462	13.0007	12.2637	12.5272	12.4337	10	15	12.1832	12.542	0.080449	0.354353	0.00616973	0.0614936	1	0.933333	8.50475e-05	0.0254402	0.0914936	1	0	-53.8235	1167.59	0.0614936	0.05	81.2863	366.469	82.7324	390.463	0
PVX_123480_1o1	12.3483	12.1861	12.0945	12.3054	14.1341	12.0521	12.3999	12.4942	12.2635	12.2416	12.2576	12.1534	12.4972	12.2816	12.1805	12.3379	13.7793	12.1711	12.5761	12.9442	13.1285	12.4349	12.598	12.42	12.3319	10	15	12.452	12.5395	0.605935	0.441028	0.630507	0.791396	1	0.646667	0.237953	0.191614	0.113873	1	0	898.664	1157.19	0.791396	0.05	696.86	451.836	795.842	488.945	0.3
PVX_081740_1o1	12.3422	12.37	12.6733	12.4145	12.5135	12.3746	12.2823	12.2468	12.387	12.3613	12.3862	12.3467	12.2963	12.5706	12.5188	12.3949	12.4581	12.6365	12.5192	12.5853	12.9502	12.9517	12.4679	12.5828	12.4063	10	15	12.3965	12.5381	0.12091	0.19345	0.174306	0.377873	1	0.766667	0.0264161	0.038235	0.0499485	1	0	687.507	1151.45	0.377873	0.05	141.018	202.392	144.806	209.522	0.4
PVX_122040_1o4	11.9714	11.9963	11.7796	11.9309	11.9032	11.8845	12.2651	11.9885	11.9747	11.9374	12.4535	12.5739	12.128	11.9459	14.7729	13.2052	11.894	12.0756	12.2135	12.2251	12.5953	12.3754	11.9425	13.722	11.9423	10	15	11.9632	12.5377	0.12394	0.799099	0.0116045	0.0851399	1	0.82	0.00660312	0.0391934	0.206327	1	0	-711.547	1149.75	0.0851399	0.05	107.009	792.343	109.956	914.163	0
PVX_095245_1o1	12.1563	12.172	12.289	12.3388	12.3571	12.5674	12.2025	12.2808	12.6313	12.2431	12.4813	12.4832	12.3873	12.3639	12.3328	12.5618	12.2918	12.371	13.3336	12.424	12.4572	12.6393	12.4445	12.4048	13.0852	10	15	12.3238	12.5374	0.16006	0.290207	0.0722705	0.229635	1	0.813333	0.00799141	0.0506154	0.0749311	1	0	422.434	1148.78	0.229635	0.05	176.746	300.888	183.057	316.929	0.2
PVX_083425_1o2	12.3613	12.4154	12.3937	12.3943	12.3866	12.3776	12.5214	12.2689	12.5653	12.3316	12.3035	12.3724	12.6482	12.5089	12.4489	12.3945	12.5444	12.3758	12.8272	12.6389	12.7124	12.6256	12.574	12.5798	12.4908	10	15	12.4016	12.5364	0.0858809	0.143275	0.169229	0.372479	1	0.78	0.019211	0.0271579	0.0369935	1	0	706.501	1144.29	0.372479	0.05	100.902	150.388	102.819	154.294	0.6
PVX_002940_1o1	12.1685	12.2141	12.2723	12.0968	12.2025	12.3	12.1134	12.2548	12.1675	12.111	12.4384	12.1753	12.4579	12.2135	12.5485	12.3154	14.1867	12.054	12.7556	12.3867	12.671	12.4552	12.2653	12.4136	12.7078	10	15	12.1901	12.5363	0.0711529	0.497772	0.0271351	0.130468	1	0.86	0.00185881	0.0225005	0.128524	1	0	-31.3887	1144.22	0.130468	0.05	72.3136	506.318	73.4503	553.494	0
PVX_090125_1o1	12.3084	12.338	12.2586	12.3686	12.4522	12.331	12.4058	12.3925	12.3217	12.4058	12.3463	12.4051	12.4112	12.4786	12.4879	12.4568	13.4101	12.5702	12.4622	12.6156	12.8206	12.535	12.3816	12.4338	12.2283	10	15	12.3583	12.5362	0.0572828	0.276133	0.113603	0.294532	1	0.84	0.00360442	0.0181144	0.0712972	1	0	546.343	1143.69	0.294532	0.05	65.5143	286.408	66.342	300.918	0.4
PVX_114080_3o5	12.3584	12.4582	12.5015	12.4193	12.4129	12.4087	12.4268	12.2308	12.3706	12.2269	12.3529	12.3198	12.601	12.2307	13.8451	12.3104	12.2723	12.3153	12.6773	12.5458	12.6108	12.5312	12.3487	12.5501	12.479	10	15	12.3814	12.5327	0.0899171	0.389561	0.248223	0.464154	1	0.613333	0.366908	0.0284343	0.100584	1	0	631.271	1129.24	0.464154	0.05	104.129	399.045	106.202	427.859	0.6
PVX_094875_2o2	12.3064	12.462	12.4712	12.2766	12.2378	12.2904	12.4524	12.3512	12.3593	12.2441	12.2655	12.3498	12.433	12.3999	12.4575	12.2459	12.3296	12.4543	12.7998	12.6885	12.7192	12.659	12.9149	12.5793	12.6815	10	15	12.3451	12.5318	0.0895888	0.204324	0.065195	0.215582	1	0.76	0.0307823	0.0283305	0.0527563	1	0	498.771	1125.72	0.215582	0.05	101.176	212.639	103.183	220.558	0.3
PVX_116795_1o1	12.2348	12.2415	12.2448	12.1406	12.2985	12.2417	12.3455	12.1483	12.1285	12.1213	12.6696	12.1878	12.5312	12.169	14.3586	12.278	12.4879	12.1381	12.3719	12.5055	12.3535	12.743	12.1311	12.6775	12.3509	10	15	12.2145	12.5302	0.0766952	0.544086	0.0515882	0.188592	1	0.8	0.0115181	0.0242532	0.140482	1	0	48.4638	1119.15	0.188592	0.05	79.2304	548.847	80.5736	604.98	0
PVX_095400_1o2	13.3045	12.1365	11.9822	12.0665	12.055	11.9945	12.2618	12.136	11.9526	12.0724	12.1423	12.0587	12.2765	12.1977	15.481	12.1793	12.1919	12.0829	12.4372	12.4544	12.2326	12.918	12.2318	12.8452	12.1695	10	15	12.1962	12.5266	0.399674	0.856254	0.17156	0.375398	1	0.806667	0.00961649	0.126388	0.221084	1	0	-11.5775	1104.24	0.375398	0.05	393.612	838.324	429.651	977.157	0.1
PVX_118570_1o1	11.8522	11.9839	12.117	12.0762	12.4131	12.0648	12.073	12.2753	12.1194	12.0269	12.486	12.074	12.4864	11.9755	12.3469	12.105	13.2809	12.0007	12.1236	12.157	12.3776	12.5322	11.9661	14.1443	13.8087	10	15	12.1002	12.5243	0.153562	0.679475	0.028578	0.133596	1	0.726667	0.0622836	0.0485605	0.17544	1	0	-313.736	1095	0.133596	0.05	145.324	674.551	150.299	761.776	0.1
PVX_099115_1o1	12.151	12.2003	12.2558	12.0365	12.0921	12.2577	12.0486	12.0673	12.7326	12.0903	12.2948	12.2855	12.527	12.7851	12.4546	12.1936	12.338	12.5518	12.5665	12.5626	12.4502	13.4852	12.5334	12.4215	12.3204	10	15	12.1932	12.518	0.206279	0.306022	0.00672463	0.0651021	1	0.893333	0.0005317	0.0652313	0.0790146	1	0	-21.2874	1069.25	0.0651021	0.05	207.025	312.603	216.6	330.201	0.1
PVX_092350_1o1	12.2523	12.379	12.4485	12.3504	12.3744	12.3604	12.432	12.4465	12.5043	12.3937	12.3706	12.3987	12.9189	12.3368	12.4448	12.2668	12.6725	12.5064	12.4598	12.5353	12.8553	12.7989	12.254	12.4127	12.5244	10	15	12.3941	12.5171	0.0691711	0.206876	0.194981	0.403126	1	0.693333	0.115134	0.0218738	0.053415	1	0	678.519	1065.37	0.403126	0.05	80.9971	213.052	82.2345	221.088	0.5
PVX_101235_1o4	12.1389	12.2262	12.1753	12.0995	12.1078	11.9707	12.3624	12.1624	12.1458	12.0853	12.3032	12.4689	12.374	12.0489	13.9176	12.1972	12.1642	12.3242	12.7081	12.6186	12.6042	12.4605	12.4689	12.539	12.5364	10	15	12.1474	12.5156	0.101345	0.42878	0.00782375	0.0708073	1	0.893333	0.0005317	0.0320482	0.110711	1	0	-167.556	1059.41	0.0708073	0.05	99.6681	432.54	101.907	467.039	0
PVX_091155_1o1.DUP	12.5602	12.5527	12.5149	12.4823	12.4492	12.3233	12.4402	12.4233	12.2868	12.4334	12.5484	12.4869	12.4611	12.4833	12.5478	12.5191	12.6226	12.6017	12.5179	12.5114	12.4679	12.5334	12.5824	12.4304	12.4084	10	15	12.4466	12.5148	0.0892041	0.0607388	0.419325	0.627948	1	0.72	0.070918	0.0282088	0.0156827	1	0	878.019	1056.39	0.627948	0.05	108.089	63.2751	110.224	63.9667	0.8
PVX_002920_1o2	12.3235	12.2974	12.1089	12.2387	12.2859	12.1896	12.4405	12.2864	12.2012	12.4443	12.608	12.2379	13.1765	12.3717	12.9955	12.4105	12.343	12.3094	12.4985	12.5062	12.3301	12.6921	12.5355	12.388	12.2643	10	15	12.2816	12.5112	0.105593	0.267557	0.0274766	0.130468	1	0.826667	0.00542836	0.0333914	0.069083	1	0	274.75	1041.41	0.130468	0.05	113.917	272.943	116.584	286.331	0.2
PVX_114125_1o1	12.5749	12.5022	12.494	12.3221	12.3146	12.2362	12.6015	12.3489	12.3792	12.3811	12.3429	12.4747	12.5141	12.3842	12.5212	12.444	12.2996	12.5536	12.7537	12.6866	12.5776	12.6377	12.4496	12.6206	12.3769	10	15	12.4155	12.5091	0.120963	0.131126	0.280125	0.499077	1	0.7	0.102507	0.038252	0.0338566	1	0	758.738	1033.2	0.499077	0.05	142.944	135.208	146.785	138.419	0.4
PVX_123725_1o1	12.3185	12.2917	12.2599	12.5934	12.3421	12.287	12.2072	12.1985	12.116	12.1757	12.1966	12.2084	12.3431	12.236	12.3734	12.444	12.8791	12.2017	12.5996	12.4327	13.5697	12.3234	12.2014	13.3181	12.2961	10	15	12.279	12.5082	0.130743	0.423603	0.08327	0.248516	1	0.713333	0.0804562	0.0413445	0.109374	1	0	265.595	1029.6	0.248516	0.05	140.404	425.336	144.486	458.836	0.1
PVX_003775_1o2	12.2914	12.3501	12.292	12.3363	12.4509	12.1926	13.845	12.2678	12.2834	12.2622	13.1156	12.4789	12.5412	12.3395	12.4571	12.3966	12.4215	12.4899	12.5497	12.5129	12.4391	12.4897	12.5569	12.518	12.2751	10	15	12.4572	12.5055	0.49227	0.186276	0.703881	0.844501	1	0.826667	0.00542836	0.15567	0.0480962	1	0	918.89	1018.41	0.844501	0.05	575.161	190.649	640.694	197.112	0.2
PVX_089045_1o1	12.277	12.4443	12.3591	12.3478	12.3861	12.3905	12.3642	12.3808	12.3653	12.2257	12.3367	12.6048	12.4663	12.2662	12.2341	12.5249	12.5066	12.3684	12.5343	12.5736	12.5886	12.9019	12.4441	12.5787	12.5983	10	15	12.3541	12.5018	0.0613882	0.16411	0.0754557	0.23583	1	0.793333	0.0137226	0.0194127	0.042373	1	0	531.128	1003.84	0.23583	0.05	69.9748	167.873	70.9227	172.876	0.2
PVX_090025_1o1.DUP	12.5995	12.5452	12.522	12.377	12.5342	12.4237	12.3494	12.3791	12.3974	12.4901	12.4592	12.4566	12.4753	12.4659	12.5192	12.4813	12.484	12.5002	12.4391	12.4791	12.4991	12.563	12.6122	12.5683	12.4687	10	15	12.4618	12.4981	0.086828	0.0482424	0.632621	0.791431	1	0.606667	0.396949	0.0274574	0.0124561	1	0	936.867	988.654	0.791431	0.05	106.347	49.7306	108.391	50.1618	0.7
PVX_085320_2o4	12.4728	12.4313	12.3035	12.8931	12.3308	12.1786	12.5308	12.2576	12.2211	12.3197	12.5846	12.2549	12.9647	12.5074	12.4795	12.3306	12.231	12.5161	12.8166	12.5524	12.4546	12.6573	12.3263	12.47	12.3104	10	15	12.3939	12.4971	0.207638	0.203827	0.27057	0.487394	1	0.68	0.143842	0.0656611	0.0526278	1	0	677.756	984.833	0.487394	0.05	239.46	207.084	250.611	214.777	0.4
PVX_117565_1o1	12.3123	12.3625	12.3114	12.2925	12.3948	12.321	12.1867	12.1572	12.1321	12.1922	12.4676	12.2317	12.3325	12.2625	12.6989	12.7049	12.2534	12.1354	12.303	12.3194	12.3062	12.2965	12.1925	13.1453	13.8017	10	15	12.2663	12.4968	0.0914904	0.446294	0.0816419	0.245844	1	0.646667	0.237953	0.0289318	0.115233	1	0	221.959	983.501	0.245844	0.05	97.8066	443.685	99.7878	480.577	0.1
PVX_092980_1o1	12.1357	12.1598	12.0276	12.1616	12.1562	12.1124	12.3722	12.1936	12.083	12.2548	12.272	12.1822	12.6024	12.2683	12.3028	12.3777	13.2574	12.2331	12.4301	12.4728	12.5913	13.3473	12.3927	12.4037	12.2857	10	15	12.1657	12.4946	0.0949603	0.349902	0.00424024	0.0500538	1	0.94	5.93497e-05	0.0300291	0.0903444	1	0	-109.763	975.002	0.0500538	0.05	94.6443	350.318	96.6349	372.957	0
PVX_096975_3o3	12.2639	12.361	12.4	12.3389	12.2881	12.2611	12.19	12.0867	12.0757	12.0821	12.4898	12.0755	12.4117	12.1367	14.8199	12.2178	12.4122	12.3165	12.247	12.2962	12.9384	12.5508	12.0428	12.2241	12.1974	10	15	12.2348	12.4918	0.120663	0.681333	0.165731	0.367831	1	0.62	0.33826	0.0381571	0.175919	1	0	115.512	963.569	0.367831	0.05	125.805	661.198	129.177	746.944	0.1
PVX_111255_1o1	12.5099	12.5178	12.4047	12.4556	12.531	12.4808	12.3879	12.3917	12.4009	12.4907	12.3736	12.4157	12.4656	12.5728	12.4768	12.5391	12.513	12.5082	12.6122	12.49	12.4907	12.5449	12.5182	12.4654	12.3566	10	15	12.4571	12.4895	0.056356	0.0692182	0.670264	0.821501	1	0.633333	0.285249	0.0178213	0.0178721	1	0	918.592	954.533	0.821501	0.05	69.0309	70.7999	69.8889	71.6824	1
PVX_082980_2o2	12.2621	12.1957	12.2672	12.2887	12.4375	12.3552	13.3955	12.1986	12.2415	12.3279	12.3421	12.3525	12.3211	12.2846	13.0253	12.3569	12.8357	12.3134	12.4959	12.4534	12.4438	12.6799	12.4238	12.4987	12.3955	10	15	12.397	12.4815	0.3584	0.210163	0.431884	0.639056	1	0.786667	0.0162759	0.113336	0.0542638	1	0	689.243	922.682	0.639056	0.05	407.491	211.106	440.794	219.198	0.2
PVX_122145_1o1.DUP	12.5181	12.6057	12.6631	12.6074	12.6615	12.6391	12.3272	12.4421	12.4254	12.4864	12.5381	12.4295	12.4669	12.4925	12.3956	12.4256	12.4433	12.4752	12.4186	12.5139	12.5214	12.4637	12.621	12.4419	12.5636	10	15	12.5376	12.4807	0.115428	0.0614882	0.504284	0.696225	1	0.666667	0.177495	0.0365017	0.0158762	1	0	1241.29	919.555	0.696225	0.05	148.542	62.5539	152.348	63.2461	0.9
PVX_123465_1o1	12.494	12.4357	12.4669	12.4999	12.5853	12.6062	12.3164	12.3716	12.3815	12.3799	13.2621	12.3416	12.4328	12.4267	12.6342	12.4291	12.3709	12.342	12.3963	12.4345	12.3833	12.5776	12.3939	12.4581	12.3224	10	15	12.4537	12.4804	0.0948989	0.232054	0.776122	0.887897	1	0.566667	0.604675	0.0300097	0.059916	1	0	905.507	918.189	0.887897	0.05	115.484	232.46	117.912	242.317	0.6
PVX_003610_1o1	12.4043	12.3472	12.306	12.4895	12.4851	12.2982	12.4656	12.4038	12.3193	12.3142	12.2982	12.6218	12.3849	12.4264	13.7039	12.342	12.4892	12.2598	12.3521	12.4339	12.1987	12.2597	12.2782	12.9877	12.1508	10	15	12.3833	12.4792	0.0764965	0.394945	0.424643	0.633666	1	0.553333	0.682951	0.0241903	0.101974	1	0	638.363	913.416	0.633666	0.05	88.8355	389.638	90.3376	418.176	0.5
MeanNeg	12.1897	12.1974	12.1972	12.1982	12.1952	12.199	12.2147	12.2088	12.2064	12.191	12.2283	12.2167	12.2235	12.2075	12.2957	12.2362	12.2146	12.2177	12.2101	12.2295	12.2176	12.2447	12.202	12.2484	12.2224	10	15	12.1998	12.2277	0.0932808	0.125201	0.412155	0.622504	1	0.680806	0.285022	0.029498	0.0323267			0	0	0.622504	0.05	95.2089	106.273	97.1757	108.681	0
[truncated: 1 more columns]
