# Supplementary figures and images for: An immunomics approach for the analysis of natural antibody responses to Plasmodium vivax infection
Source: Royal Society of Chemistry journal article supplement (doi:10.1039/c5mb00330j), 2015-06-11

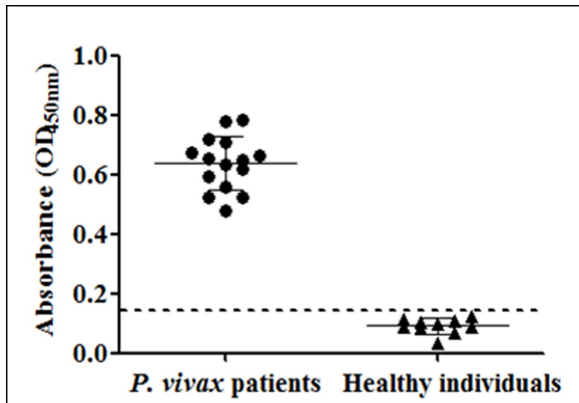

Supplement: c5mb00330j2.pdf [file c5mb00330j2.pdf]

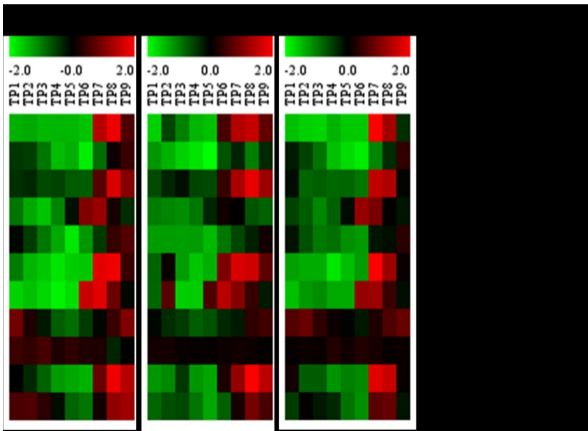

Supplement: c5mb00330j3.pdf [file c5mb00330j3.pdf]
